# Supplementary material
Source: PubMed Central journal article supplement (PMC2828709)
Supplement: tpc.109.070763_1.pdf [file tpc.109.070763_1.pdf]

**Supplemental data for**  
**BLADE-ON-PETIOLE1 coordinates organ determinacy and axial**  
**polarity in Arabidopsis by directly activating *ASYMMETRIC LEAVES2***

Ji Hyung Jun, Chan Man Ha and Jennifer C. Fletcher

**This PDF file contains:**

Supplemental Figures S1 through S11

Supplemental Tables S1 through S3

Supplemental Methods

Supplemental References

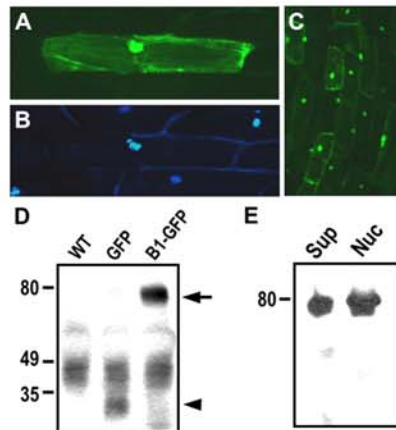

**Supplemental Figure 1.** Subcellular localization of BOP1 protein.

(A) Epidermal onion cells transiently transformed with a  $35S_{pro}:BOP1-GFP$  construct. After a 24 hour incubation the cells were observed under fluorescence using a Zeiss Axiophot microscope with BP 450/90 FT 510 LP 520 filters. (B) DAPI staining in the nuclei and cell wall of the onion cell in (A). (C) Confocal image of hypocotyl cells from a  $35S_{pro}:BOP1-GFP$  transgenic plant. Expression in onion cells and DAPI staining were prepared as described (Kinkema et al., 2000). (D) An immunoblot of seedling protein extracts probed with an anti-GFP antibody. No major degradation bands of the size of free GFP were observed. The arrow denotes the position of the band corresponding to full-length BOP1-GFP fusion protein. An arrowhead denotes the position of the band corresponding to GFP alone. WT, extract from a wild-type *Ler* plant; GFP, extract from transgenic plants of  $35S_{pro}:GFP$  (Kinkema et al., 2000); B1-GFP, extract from a  $35S_{pro}:BOP1-GFP$  transgenic plant. (E) An immunoblot showing the distribution of BOP1-GFP fusion protein between the cytosolic (Sup) and nuclear (Nuc) fractions. Nuclei were enriched from 10-day-old  $35S_{pro}:BOP1-GFP$  seedlings.

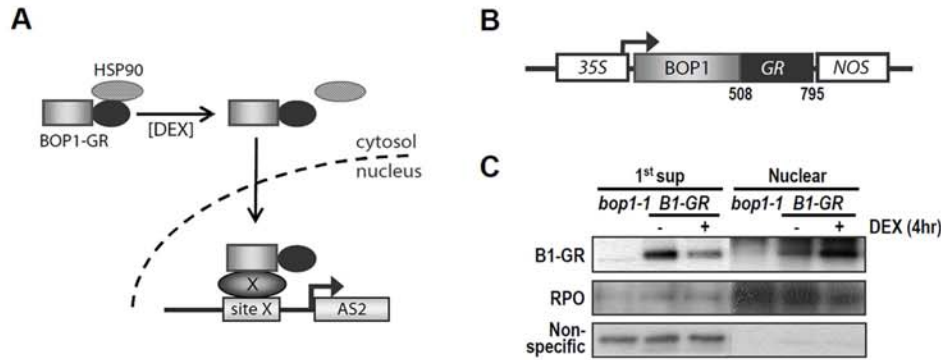

**Supplemental Figure 2. Dex-dependent enrichment of BOP1-GR in the nuclear fraction.**

(A) Strategy used to control the nuclear localization of BOP1 and working model for the regulation of the *AS2* locus by BOP1. Without Dex treatment, BOP1-GR protein is retained in the cytoplasm through an association with the heat shock protein HSP90. Because BOP1 is recruited to the *AS2* promoter upon Dex treatment, although it does not contain a known DNA binding domain, we hypothesize that BOP1 is recruited by an unknown protein (protein X) to a specific DNA sequence motif (site X) to function as a transcriptional coactivator. Alternatively, BOP1 may bind directly to the *AS2* promoter via an unidentified DNA binding domain. (B) Schematic representation of the *35S<sub>pro</sub>::BOP1-GR* construct. GR, glucocorticoid receptor; 35S, CaMV 35S promoter; NOS, nos terminator. (C) An immunoblot showing the distribution of BOP1-GR fusion protein between the cytosolic (1<sup>st</sup> sup) and nuclear (Nuclear) fractions. Nuclei were enriched as described (Huq et al., 2003) from 15-day-old *bop1-1* and *35S<sub>pro</sub>::BOP1-GR bop1-1* seedlings after incubation in the presence (+) or absence (-) of 10  $\mu$ M Dex for 4 hours. Quantitative recovery and equivalent loading of nuclear-derived proteins were verified by probing same blot with an anti-RNA polymerase  $\alpha$ -subunit (RPO) antibody (Covance). Non-specific protein detection by an anti-GR antibody (Santa Cruz Biotechnology) was used as a loading control for the cytosolic fraction.

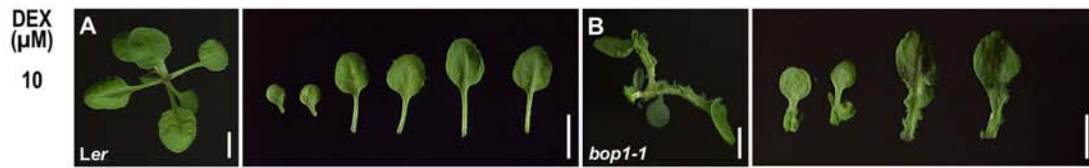

**Supplemental Figure 3.** Phenotypes of *Ler* and *bop1-1* plants after Dex treatment.

(A) *Ler*. (B) *bop1-1*. Representative 16-day-old whole plants (left panel) and heteroblastic leaf series (right panel) from cotyledon to leaf number two or four are shown for each line. Plants were grown on MS media containing 10  $\mu$ M Dex under continuous light conditions. Bars: 5 mm.

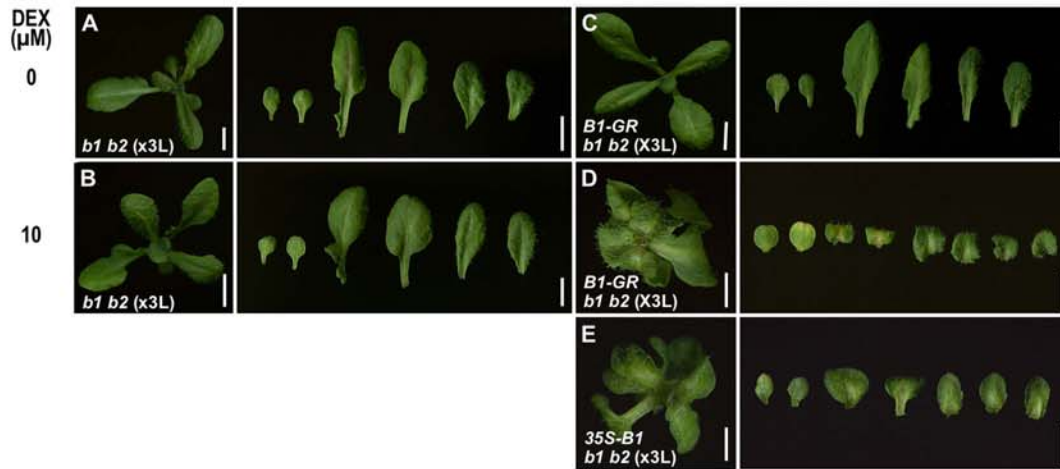

**Supplemental Figure 4.** Phenotypes of *35S<sub>pro</sub>:BOP1-GR bop1-4 bop2-11* plants.

(A, B) *bop1-4 bop2-11* plants. (C, D) *35S<sub>pro</sub>:BOP1-GR bop1-4 bop2-11* plants (E) *35S<sub>pro</sub>:BOP1 bop1-4 bop2-11* plants. (A-E). Complementation of the *bop1-4 bop2-11* phenotype with the BOP1-GR fusion protein in a Dex-dependent manner, using *bop1-4 bop2-11* plants backcrossed three times into *Ler* (X3L). Representative 16-day-old whole plants (left panel) and heteroblastic leaf series (right panel) from cotyledon to leaf number two or four are shown for each line. Plants were grown on MS media containing 0.1% EtOH (mock treatment) or 10 μM Dex under continuous light conditions. Bars: A-C 10 mm; D, E 5 mm.

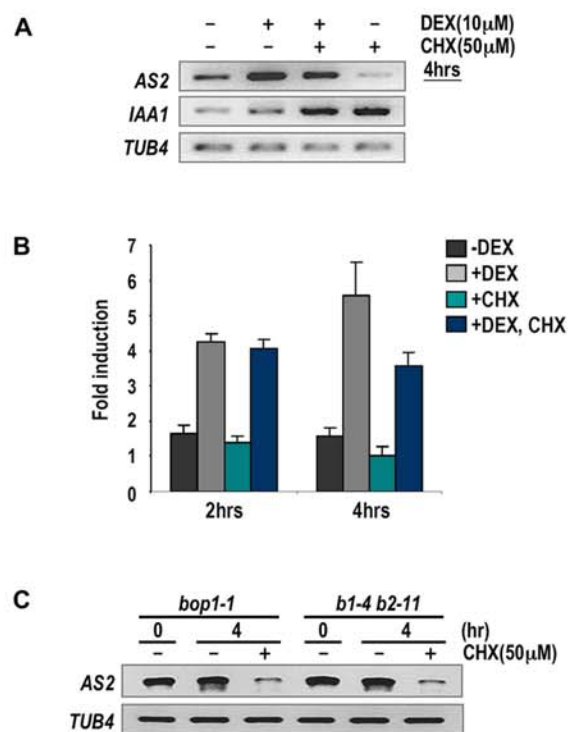

**Supplemental Figure 5.** Direct regulation of *AS2* expression by BOP1.

(A) RT-PCR analysis of *AS2* and *IAA1* expression in 11-day-old *35S<sub>pro</sub>:BOP1-GR* plants 2 or 4 hours after mock, Dex, CHX or Dex+CHX treatment. *TUB4* was used as a control. (B) Real-time qRT-PCR analysis of *AS2* in 11-day-old *35S<sub>pro</sub>:BOP1-GR* plants after 2 or 4 hours of mock (-Dex), Dex, CHX or Dex+CHX treatment. Expression values are normalized to *TUB4*. Mean transcript levels were determined by quantitative real-time RT-PCR analyses of three biological replicates. Error bars indicate s.d. (C) RT-PCR analysis of *AS2* expression in 11-day-old *bop1-1* and *bop1-4 bop2-11* plants after 4 hours of mock or CHX treatment. *TUB4* was used as a control. *AS2* transcript levels showed the same response to the addition of CHX alone in Dex-treated or non-treated BOP1-GR samples as they did in untransformed *bop* plants, indicating that this CHX effect appears to be independent of BOP1 function. In (A) and (C) the PCR products were visualized by EtBr staining in agarose gels.

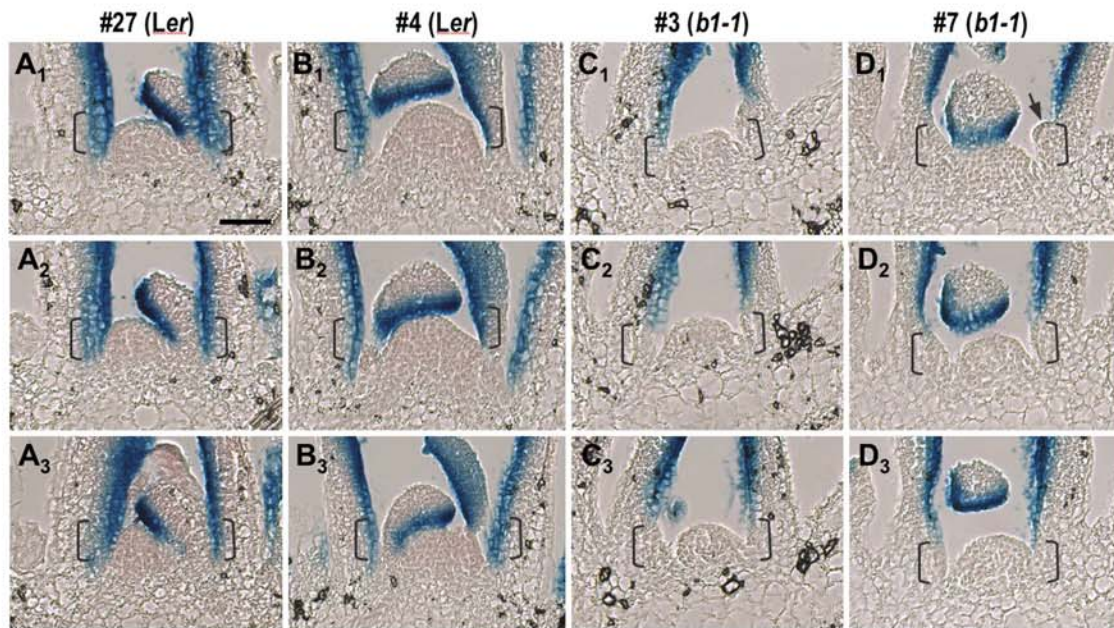

**Supplemental Figure 6.** Polar regulation of *AS2* expression by BOP in seedlings.

(A, B) Serial sections of a 10-day-old *AS2<sub>pro</sub>:GUS Ler* seedling shoot apex. (C, D) Serial sections of a 10-day-old *AS2<sub>pro</sub>:GUS bop1-1* seedling shoot apex. Brackets denote the proximal region of the rosette leaves. The numbers at the top indicate independently transformed lines. The arrow indicates an ectopic outgrowth in the proximal region of a developing *AS2<sub>pro</sub>:GUS bop1-1* rosette leaf. Bar: 100  $\mu$ m.

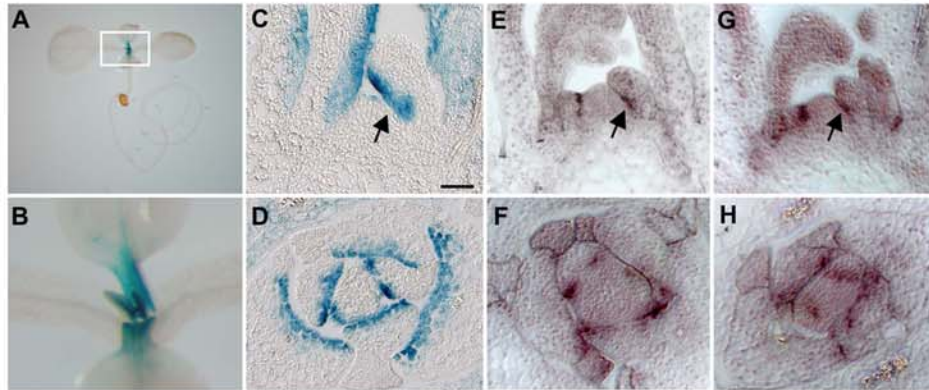

**Supplemental Figure 7.** Comparison of *AS2*, *BOP1* and *BOP2* expression patterns.

(A) GUS activity in 9-day-old *AS2<sub>pro</sub>:GUS Ler* seedlings. (B) Magnified view of the region boxed in (A). (C) Longitudinal section of a 9-day-old *AS2<sub>pro</sub>:GUS Ler* shoot apex. (D) Transverse section of a 9-day-old *AS2<sub>pro</sub>:GUS Ler* shoot apex. (E, F) RNA in situ hybridization of *BOP1* expression in a 9-day-old *Ler* seedling. (G, H) RNA in situ hybridization of *BOP2* expression in a 9-day-old *Ler* seedling. Arrows indicate where *BOP1* and *BOP2* expression overlaps with *AS2* expression in the proximal region of developing leaf primordia. Bars: C-H 100  $\mu$ m.



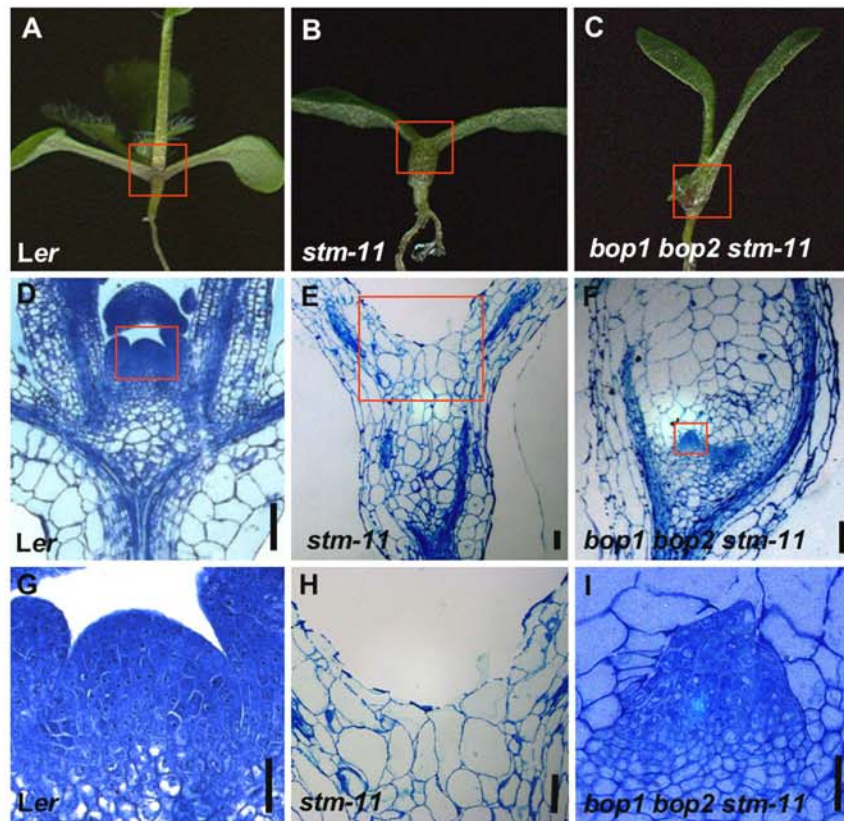

**Supplemental Figure 8.** Ectopic shoot meristem formation in rescued *stm-11* plants.

(A) A 10-day-old *Ler* seedling. (B) A 10-day-old *stm-11* seedling. (C) A 10-day-old *bop1-4 bop2-11 stm-11* seedling. (D, G) Longitudinal section of (A). (E, H) Longitudinal section of (B). (F, I) Longitudinal section of (C). Boxes in (A-C) indicate the sectioned region in (D-F). (G-I) are magnified views of boxed regions in (D-F). Bars: D-F and H 100  $\mu\text{m}$ ; G, I 20  $\mu\text{m}$ .

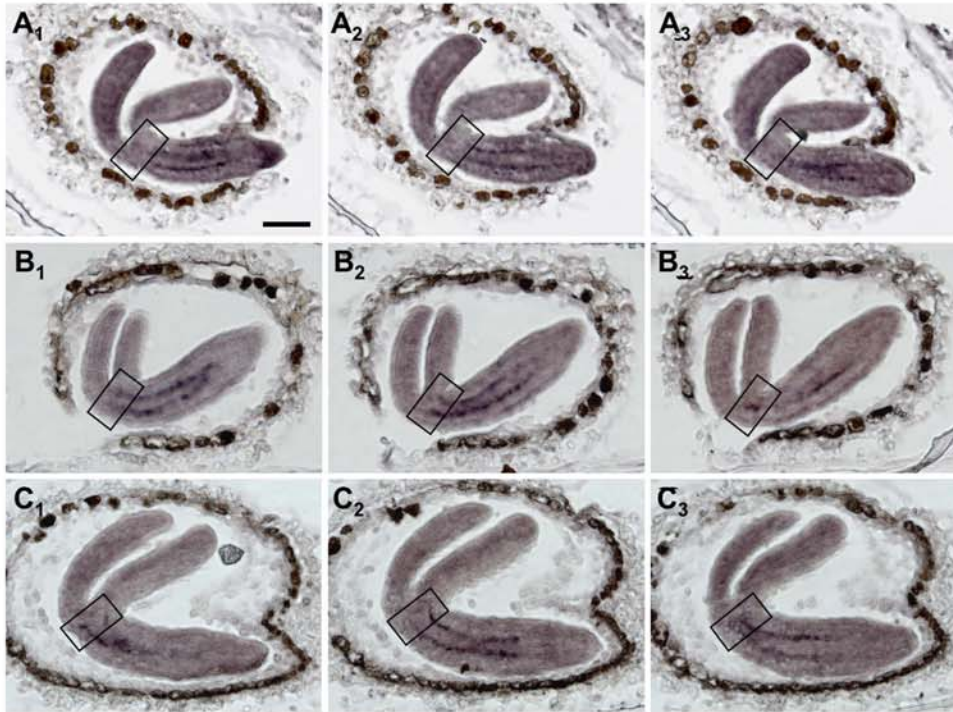

**Supplemental Figure 9.** Regulation of embryonic *BP* expression by *BOP1* and *BOP2*. (A) *BP* expression in serial sections of a bent-cotyledon stage *Ler* embryo. (B) *BP* expression in serial sections of a bent-cotyledon stage *bop1-4 bop2-11* embryo. (C) *BP* expression in serial sections of a bent-cotyledon stage *bop1-1* embryo. Boxes denote the junction between the hypocotyl and base of the cotyledons. Bars: 100  $\mu$ m.



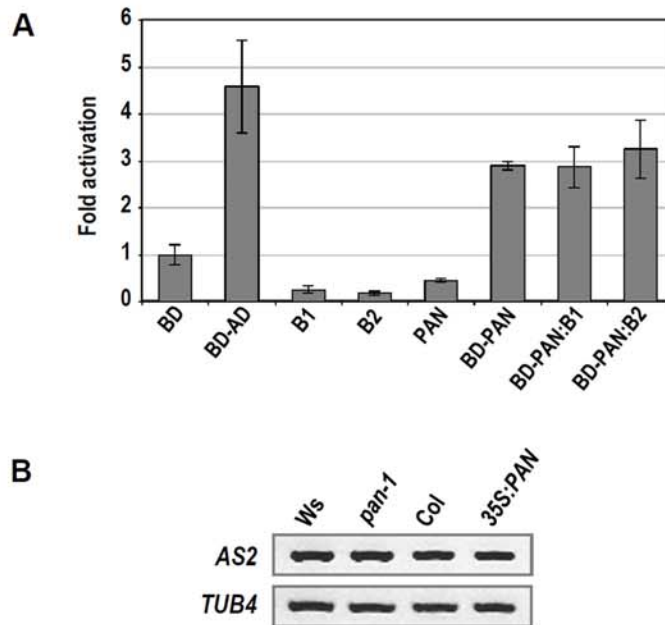

**Supplemental Figure 11.** Analysis of the relationship between BOP, AS2 and PAN.

(A) Transcription activation assays of BOP1, BOP2 and PAN. Gal4 BD-AD and BD were used as positive and negative controls, respectively. BD-PAN protein was mixed with BOP1 (BD-PAN:B1) or BOP2 (BD-PAN:B2) protein at a 1:1 ratio. Fold activation represents the relative luciferase units obtained for the given construct(s) divided by those obtained with the unfused Gal4 BD construct alone (n=9). Error bars represent the s.d. AD:GAL4 activation domain; BD:GAL4 DNA binding domain; B1:BOP1; B2:BOP2.

(B) RT-PCR analysis of *AS2* transcription in 11-day-old wild-type (Ws or Col), *pan-1* and *35S<sub>pro</sub>::PAN* plants. The PCR products were visualized by EtBr staining in agarose gels and *TUB4* expression was used as a control.

Supplemental Table 1. Rescue of leaf phenotypes by the *BOP1<sub>pro</sub>:AS2* construct.

| Genotype              | T <sub>1</sub> plants <sup>a</sup> | Rescued plants <sup>b</sup> | Extent of rescue |                      |
|-----------------------|------------------------------------|-----------------------------|------------------|----------------------|
|                       |                                    |                             | Complete         | Partial <sup>c</sup> |
| <i>bop1-4 bop2-11</i> | 230                                | 12 (5.2%)                   | 0                | 12                   |
| <i>bop1-1</i>         | 37                                 | 4 (10.8%)                   | 0                | 4                    |
| <i>as2-1</i>          | 93                                 | 37 (39.8%)                  | 0                | 37                   |

<sup>a</sup> Total number of T<sub>1</sub> transgenic plants analyzed.

<sup>b</sup> Total number of T<sub>1</sub> transgenic plants that showed leaf development from ectopic SAM. The percentage of rescued plants is shown in parenthesis.

<sup>c</sup> Partially rescued plants displayed several complete suppression of the ectopic organ outgrowth (*bop*) or lobed leaf (*as2*) phenotype in more than one rosette leaf per plant, and in the remaining rosette leaves the extent of ectopic organ outgrowth or leaf lobing was reduced compared to untransformed control plants.

Supplemental Table 2. *AS2<sub>pro</sub>:GUS* expression in wild-type, *stm* and *stm bop1 bop2* embryos.

| Genotype                       | <i>AS2<sub>pro</sub>:GUS</i> pattern |                                     |
|--------------------------------|--------------------------------------|-------------------------------------|
|                                | WT                                   | Ectopic expression<br>in shoot apex |
| <i>Ler</i>                     | 311                                  | 0                                   |
| <i>stm-11/+</i>                | 458                                  | 140                                 |
| <i>bop1-4 bop2-11 stm-11/+</i> | 430                                  | 0                                   |

GUS activity was scored in bent cotyledon-stage embryos after genotyping the parental plants. WT, wild-type *Ler*.

Supplemental Table 3. Oligonucleotides used in this study.

| Purpose                      | Construct/<br>Gene            | Name                                                                                | Sequence                                                                           |
|------------------------------|-------------------------------|-------------------------------------------------------------------------------------|------------------------------------------------------------------------------------|
| Cloning                      |                               |                                                                                     |                                                                                    |
| GUS reporter                 | <i>AS2<sub>pro</sub>:GUS</i>  | AS2 <sub>pro</sub> (1.0)                                                            | CACCGATGAGCTTTGCCCATCGA                                                            |
|                              |                               | AS2 <sub>pro</sub> (2.1)                                                            | CACCATAGGGTTACTAATCATGGGT                                                          |
|                              |                               | AS2 <sub>pro</sub> (2.6)                                                            | CACCCTGCTAGTACATAAGGTAATG                                                          |
|                              |                               | AS2 <sub>pro</sub> (3.2)                                                            | CACCTGAAAACGATATCAGCCAAACA                                                         |
|                              |                               | AS2 <sub>pro</sub> (4.0)                                                            | CACCGCGGTAAATTGGTCTTCGCT                                                           |
|                              |                               | AS2 <sub>pro</sub> -F1                                                              | CACCTAATGATCGGTGAGAGGGATT                                                          |
|                              |                               | AS2 <sub>pro</sub> -R                                                               | TTAATGACTTGAAAATGGAGTTT                                                            |
|                              |                               | AS2 <sub>pro</sub> (2.6)-R                                                          | CATTACCTTATGTAAGTAGCAG                                                             |
|                              |                               | 35 <sub>pro</sub> (-46)-PstI-F                                                      | AACTGCAGGCAAGACCCCTTCTCTATATG<br>CAAGACCCCTTCTCTATATAAGGAAGTTC<br>ATTCATTTGGAGAGGA |
|                              | GUS(stop)-BstEII-R            | GGGTAACCTCATTGTTTGCCTCCCTGCTTC<br>ATTGTTTGCCTCCCTGCTGCGGTTTTTCAC<br>CGAAGTTCATGCCAG |                                                                                    |
|                              | <i>BOP1<sub>pro</sub>:GUS</i> | BOP1 <sub>pro</sub> -6F                                                             | CACCTAACTCTTTGAAGCTGTATGT                                                          |
|                              |                               | pBOP1 <sub>pro</sub> -R                                                             | TGAGTGATTCTTCGAAAGTATTG                                                            |
| Inducible BOP1<br>activation | <i>BOP1-GR</i>                | FBN(3)                                                                              | GGATCCGCGCCGCTGCCGAGCGGCAG<br>CGGCAGCGAAATGGTGGTGGTGGTGATG                         |
|                              |                               | FBN(1)                                                                              | ATGAGCAATACTTTCCAACAA                                                              |
| Localization                 | <i>BOP1-GFP</i>               | FKN(1)                                                                              | ACGGTACCTATCAAAGAAATCAACAAAG<br>GAGCT                                              |
|                              |                               | FBN(1)                                                                              | CCGGATCCGCGAAATGGTGGTGGTGGTGA<br>TG                                                |
| Transactivation assay        | <i>BD-BOP1</i>                | TR-B1-T                                                                             | GGATCCAGCAATACTTTCAAGAATCACT                                                       |
|                              |                               | TR-B1-R                                                                             | GGTACCCTAGAAATGGTGGTGGTGGTGAT                                                      |
|                              | <i>BD-BOP2</i>                | TR-B2-F                                                                             | GGATCCAGCAATCTTGAAGAATCTTTGAG<br>A                                                 |
|                              |                               | TR-B2-R                                                                             | GGTACCCTAGAAGTGATGTTGATGATGGT                                                      |
|                              | <i>BD-hop1-1</i>              | TR-B1-T                                                                             | GGATCCAGCAATACTTTCAAGAATCACT                                                       |
|                              |                               | TR-mb1-R                                                                            | GGTACCCTACAAAAGACGTAGAAATGG<br>T                                                   |
| <i>BD-PAN</i>                | PAN-SmaI-F                    | CCCGGGATGCAGAGCAGCTTCAAAAC                                                          |                                                                                    |
|                              | PAN-KpnI-R                    | GGTACCTTAGTCTCTAGGTCTGGCTA                                                          |                                                                                    |
| Yeast two hybrid             | <i>AD/BD-BOP1</i>             | BOP1-Y2H-F                                                                          | CACCAGCAATACTTTCAAGAATCA                                                           |
|                              |                               | BOP1-Y2H-R                                                                          | CTAGAAATGGTGGTGGTGGT                                                               |
|                              | <i>AD/BD-BOP2</i>             | BOP2-F(g)I                                                                          | CACCAGCAATCTTGAAGAATCTTTGA                                                         |
|                              |                               | BOP2-R(g)                                                                           | CTAGAAGTGATGTTGATGAT                                                               |
|                              | <i>AD/BD-hop1-1</i>           | BOP1-Y2H-F                                                                          | CACCAGCAATACTTTCAAGAATCA                                                           |
|                              |                               | mbop1-Y2H-R                                                                         | CTACAAAAGACGTAGAAATGGT                                                             |
| Complementation              | <i>BOP1<sub>pro</sub>:AS2</i> | BOP1 <sub>pro</sub> -6-EcoRI-F                                                      | GGAATTCCTAACTCTTTGAAGCTGTATGT                                                      |
|                              |                               | BOP1 <sub>pro</sub> -PstI-R                                                         | AACTGCAGCAGCTCCTTTGTTGATTTCTTT<br>GA                                               |
|                              |                               | AS2-PstI-F                                                                          | AACTGCAGCATGGCATCTTCTTCAACAAA<br>CT                                                |
|                              |                               | AS2-BstEII-R                                                                        | GGGTAACCCTCAAGACGGATCAACAGTA<br>C                                                  |
| <i>In situ</i> probe         | <i>BOP1</i>                   | IF(5)                                                                               | ATAGTCTCTCTCTCTCTTCTT                                                              |
|                              |                               | IF(3)                                                                               | ACCATAACAACAATTTAATTAGATATTG                                                       |
|                              | <i>BOP2</i>                   | IIF(5)                                                                              | CTTTCAGAGAGGAGGAGCAA                                                               |
|                              |                               | IIF(3)                                                                              | TAAAGATAAGATATTAATCGATGGCA                                                         |
| Expression analysis          |                               |                                                                                     |                                                                                    |
| RT-PCR                       | <i>AS1</i>                    | AS1-RTF                                                                             | AAACTTGGTGAGTCTGATATGCC                                                            |
|                              |                               | AS1-RTR                                                                             | AAGAGAGACAACGTTGGAGTGG                                                             |
|                              | <i>AS2</i>                    | AS2-RTF                                                                             | TCAAGACGGATCAACAGTACGG                                                             |
|                              |                               | AS2-RTR                                                                             | CTTCTTCAACAAACTCACCATGC                                                            |
|                              | <i>LOB/ASL4</i>               | LOB R                                                                               | AAGATTTTGTGGACGTTGGC                                                               |
|                              |                               | LOB F                                                                               | TTGGAAGCGAAATTCAAAGG                                                               |
|                              | <i>LBD36/ASL1</i>             | LBD36-F                                                                             | TGCGCAGCTTGTAATTTCTTGA                                                             |
|                              |                               | LBD36-R                                                                             | TTGCGGTTGATGATGATGGTGT                                                             |
|                              | <i>BP</i>                     | KNAT1-F                                                                             | GATGATCCCATATTGTCACTCTTCCC                                                         |
|                              |                               | KNAT1-R                                                                             | ATGGAAGAATACCAGCATGACAAC                                                           |

|                  |                               |                             |                               |
|------------------|-------------------------------|-----------------------------|-------------------------------|
|                  | <i>KNAT2</i>                  | KNAT2-F                     | CCGAAGGCTTCCAATGGCG           |
|                  |                               | KNAT2-F                     | GCGGCGATCACTGATCGTATC         |
|                  | <i>KNAT6</i>                  | KNAT6-F                     | TCATTCTCCGGTAAAGAATGATCCACTAG |
|                  |                               | KNAT6-R                     | ATCTACAATTTCCATTCGGCCGGTG     |
|                  | <i>PHB</i>                    | PHB-5                       | TGATGGTCCATTTCGATGAGC         |
|                  |                               | PHB-3                       | TCTAAACTCACGAGGCCGCA          |
|                  | <i>FIL</i>                    | FIL-3                       | GCTATGTCCAATGCAACTTT          |
|                  |                               | FIL-4                       | TTCTTGGCAGCAGCACTAAA          |
|                  | <i>IAA1</i>                   | IAA1-F                      | ATGGAAGTCACCAATGGGC           |
|                  |                               | IAA1-R                      | TCATAAGGCAGTAGGAGCTTCGGATCC   |
|                  | <i>TUB4</i>                   | TUB4-F                      | CCTCTTCTTCTCCTCGTAC           |
|                  |                               | TUB4-R                      | AGAGGTTGACGAGCAGATGA          |
|                  | <i>EF1<math>\alpha</math></i> | EF1-F                       | CAGGCTGATTGTGCTGTTCTTATCAT    |
|                  |                               | EF1-R                       | CTTGTAGACATCTGAAGTGGGAAGA     |
| qRT-PCR          | <i>AS2</i>                    | AS2-q-F1                    | ATCAACTTACTCGCCGGAGC          |
|                  |                               | AS2-q-R1                    | GTCCAATGGCAAGAATCCCA          |
|                  | <i>LOB/ASL4</i>               | LOB-q-F1                    | GAAGAAAAACAAATGGCGTCCG        |
|                  |                               | LOB-q-R1                    | AGATTTTGTGGACGTTGGCG          |
|                  | <i>TUB4</i>                   | TUB-q-F1                    | GGTCAATACGTCGGCGATTC          |
|                  |                               | TUB-q-R1                    | TCTGACCGAACGGACCAGAT          |
| Chromatin IP     |                               |                             |                               |
| qPCR             | <i>AS2</i>                    | AS2 <sub>pro</sub> -4.2-qF  | TCAACAAAACCTCGGGCTACTTG       |
|                  |                               | AS2 <sub>pro</sub> -4.2-qR  | GGACGTCAATCACACCAACAAA        |
|                  |                               | AS2 <sub>pro</sub> -3.0-qF1 | TTGCAGACTCTGCTCCAACAGT        |
|                  |                               | AS2 <sub>pro</sub> -3.0-qR1 | CGAAGAAGCGTGCAAAGAGAA         |
|                  |                               | AS2-q-F1                    | ATCAACTTACTCGCCGGAGC          |
|                  |                               | AS2-q-R1                    | GTCCAATGGCAAGAATCCCA          |
| PCR              | <i>AS2</i>                    | C-AS2-4.4-F                 | CGAATAAATACTATATGTCCTATGT     |
|                  |                               | C-AS2-4.15-R                | ATCAAATCCTCCCTATCAGA          |
|                  |                               | C-AS2-4.0-F                 | TCTTACCGTCTATAGTTTCCC         |
|                  |                               | C-AS2-3.7-R                 | TGAGTACATTATCACAATCCTC        |
|                  |                               | C-AS2-3.7-F                 | GAGGATTGTGATAATGTACTCA        |
|                  |                               | C-AS2-3.4-R                 | ACGATTAAGTAAAATCATCTCCA       |
|                  |                               | C-AS2-3.4-F                 | TGGAGATGATTTTACTTAATCGT       |
|                  |                               | C-AS2-3.2-R                 | TGTTTGGCTGATATCGTTTTCA        |
|                  |                               | C-AS2-3.0-F                 | CAACAATGCAATATGCAACCA         |
|                  |                               | C-AS2-2.7-R                 | CTTTGGGTTAAGCGATTGTC          |
|                  |                               | C-AS2-2.5-F                 | TACAAAATGGCACACTTTATG         |
|                  |                               | C-AS2-2.2-R                 | CCATGATTAGTAACCCATATGA        |
|                  |                               | C-AS2-2.2-F                 | TCATAGGGTTACTAATCATGG         |
|                  |                               | C-AS2-1.9-R                 | AGTTTAGGATCAGTACTCCCTA        |
|                  |                               | C-AS2-1.6-F                 | AGCTTTTGTCAAACCGTATCA         |
|                  |                               | C-AS2-1.3-R                 | ACCCTAGCATAGACTCTAACA         |
|                  |                               | C-AS2-1.0-F                 | AGATGAGCTTTGCCCATCGA          |
|                  |                               | C-AS2-0.7-R                 | CAGACCTAGAGATATGTGTAG         |
|                  |                               | C-AS2-0.7-F                 | CTACACATATCTTAGGTCTG          |
|                  |                               | C-AS2-0.4-R                 | TCTGCTTTCTTTAAGCTGCT          |
| Genotyping       |                               |                             |                               |
| Mutant isolation | <i>STM</i>                    | stm-11-F1                   | AGGTTGGAGCACCACCGGA           |
|                  |                               | stm-11-R1                   | AACCGGAGAAAGAGGAAGGT          |
|                  | <i>BP</i>                     | bp-F1                       | GCATTACAAGTGGCCATATC          |
|                  |                               | bp-R1                       | CTTCTGACTCCTGCCACA            |



## Supplemental Methods

### *Protein detection*

Protein was extracted from 10 to 15-day-old seedlings as described (Huq et al., 2003). Forty micrograms of protein from the first supernatant and 20 µg protein from the nuclear fractions were separated on a 6-8% SDS-PAGE gel, blotted and probed with an anti-GFP antibody (Santa Cruz Biotechnology).

### *Construction of transgenic plants*

The *BOPI-GFP* fusion construct was generated in the pEVS vector (Carnegie Institution) carrying 35S-MCS-(Ala)<sub>10</sub>-EGFP using the KpnI and BamHI restriction sites, and the Not I cassette fragment transferred into pART27 (Gleave, 1992). Primer sequences are listed in Supplemental Table 3.

### *Expression analysis*

For GUS staining, whole-mount embryo clearing was performed in Hoyer's medium (Liu and Meinke, 1998) and the samples visualized using a Zeiss Axiophot microscope equipped with Nomarski optics. For RT-PCR, cDNA was synthesized from 5 mg of total RNA using an oligo(dT)<sub>18</sub> primer and SuperScript III reverse transcriptase (Invitrogen). For RT-PCR and real-time RT-PCR analysis, one and 0.1 microliter of the first-strand cDNA reaction was used as a template, respectively. The annealing temperature for RT-PCR was 55°C for all primer pairs and the number of PCR cycles was *EF1α*: 24 cycles; *TUB4*: 26 cycles; *AS1*, *AS2*, *IAA1*: 27 cycles; *BP*, *KNAT2*, *KNAT6*, *FIL*, *PHB*: 30 cycles; *LOB*: 36 cycles; *LBD36*: 39 cycles. Primer sequences are listed in Supplemental Table 3.

### *Histological analysis*

Seedling samples were fixed and prepared as described previously (Ha et al., 2003). Tissue sections (2 µm thick) were cut using a rotary microtome (MICROM International) and stained with methylene blue.

### *Transactivation assays*

For the Gal4 DNA binding domain (BD) fusion, the *PAN* coding sequence was amplified and cloned into the *Sma*I and *Kpn*I restriction sites in frame to the BD in the pMN6 plasmid (Huq et al., 2004). Primer sequences are listed in Supplemental Table 3. Up to 5 µg of each effector and reporter plasmid, as well as 0.2 µg of internal control plasmid, were delivered to the tissues by particle bombardment. Transcription activity was measured using the dual-Luciferase system (Promega) from three bombardments repeated three times.

### Supplemental References

- Gleave, A.P.** (1992). A versatile binary vector system with a T-DNA organisational structure conducive to efficient integration of cloned DNA into the plant genome. *Plant Mol Biol* **20**, 1203-1207.
- Ha, C.M., Kim, G.-T., Kim, B.C., Jun, J.H., Soh, M.S., Ueno, Y., Machida, Y., Tsukaya, H., and Nam, H.G.** (2003). The *BLADE-ON-PETIOLE1* gene controls leaf pattern formation through the modulation of meristematic activity in Arabidopsis. *Development* **130**, 161-172.
- Huq, E., Al-Sady, B., and Quail, P.H.** (2003). Nuclear translocation of the photoreceptor phytochrome B is necessary for its biological function in seedling photomorphogenesis. *Plant J* **35**, 660-664.
- Kinkema, M., Fan, W., and Dong, X.** (2000). Nuclear localization of NPR1 is required for activation of PR gene expression. *Plant Cell* **12**, 2339-2350.
- Huq, E., Al-Sady, B., Hudson, M., Kim, C., Apel, K., and Quail, P.H.** (2004). Phytochrome-interacting factor 1 is a critical bHLH regulator of chlorophyll biosynthesis. *Science* **305**, 1937-1941.
- Liu, C.M., and Meinke, D.** (1998). The titan mutants of Arabidopsis are disrupted in mitosis and cell cycle control during seed development. *Plant J* **16**, 21-31.
